# Supplementary material for: A new class of low molar mass chiral metallomesogens: synthesis and characterization
Source: Royal Society of Chemistry journal article supplement (doi:10.1039/c1jm11947h), 2011-01-01
Supplement: c1jm11947h.pdf [file c1jm11947h.pdf]

## A New Class of Low Molar Mass Chiral Metallomesogens: Synthesis and Characterization

G. Shankera<sup>†a</sup> and C. V. Yelamaggad<sup>a\*</sup>

<sup>a</sup>Centre for Soft Matter Research, PO Box 1329, Jalahalli, Bangalore 560013, India. Email: yelamaggad@csmr.res.in

<sup>†</sup>Present address: Institute of Chemistry, Organic Chemistry, Martin-Luther-University Halle-Wittenberg, Kurt Mothes Str. 2, D-06120 Halle/Saale, Germany

### ***SUPPORTING INFORMATION***

#### Contents

- I. General**
- II. <sup>1</sup>H and <sup>13</sup>C NMR spectrum.**
- III. Cyclic voltammograms and UV spectra.**
- IV. General synthetic procedure and their spectral datas.**

#### **I. General**

The requisite starting materials were obtained from either from Aldrich or Lancaster Company and used as received. All the solvents were purified and dried by standard methods prior to use. The absorption spectra were recorded on a Perkin-Elmer Lambda 20 UV-Vis spectrometer. IR spectra were recorded using Perkin Elmer Spectrum 1000 FT-IR spectrometer. <sup>1</sup>H NMR spectra were recorded using either a Bruker AMX-400 (400 MHz) spectrometer and the chemical shifts are reported in parts per million (ppm) relative to tetramethylsilane (TMS) as an internal standard. Mass spectra were recorded on a Jeol-JMS-600H spectrometer in FAB+ mode using 3-nitrobenzyl alcohol as a liquid matrix. CD spectrums were recorded with the aid of Jasco J-810 spectropolorimeter. Elemental analyses were done using Eurovector model EA 3000 CHNS analyzer. The identification of the mesophases and the transition temperatures of the compounds were initially determined using a polarizing microscope (Leitz DMRXP) in conjunction with a programmable hot stage (Mettler FP90). The transition temperatures and associated enthalpies were determined by differential scanning calorimetry (Perkin Elmer DSC7). Cyclic voltammetry measurement was carried out with CH instrument (Texas, USA) model 619B series computer controlled potentiostat. All the experiment was performed in dry box under N<sub>2</sub> atmosphere at room temperature. All the potential values quoted in this paper referred to Ag wire as the quasi-reference electrode. The electrochemical potential of Ag was calibrated with respect to ferrocene / ferrocenium (Fc / Fc<sup>+</sup>) couple.

## II. $^1\text{H}$ and $^{13}\text{C}$ NMR spectrum

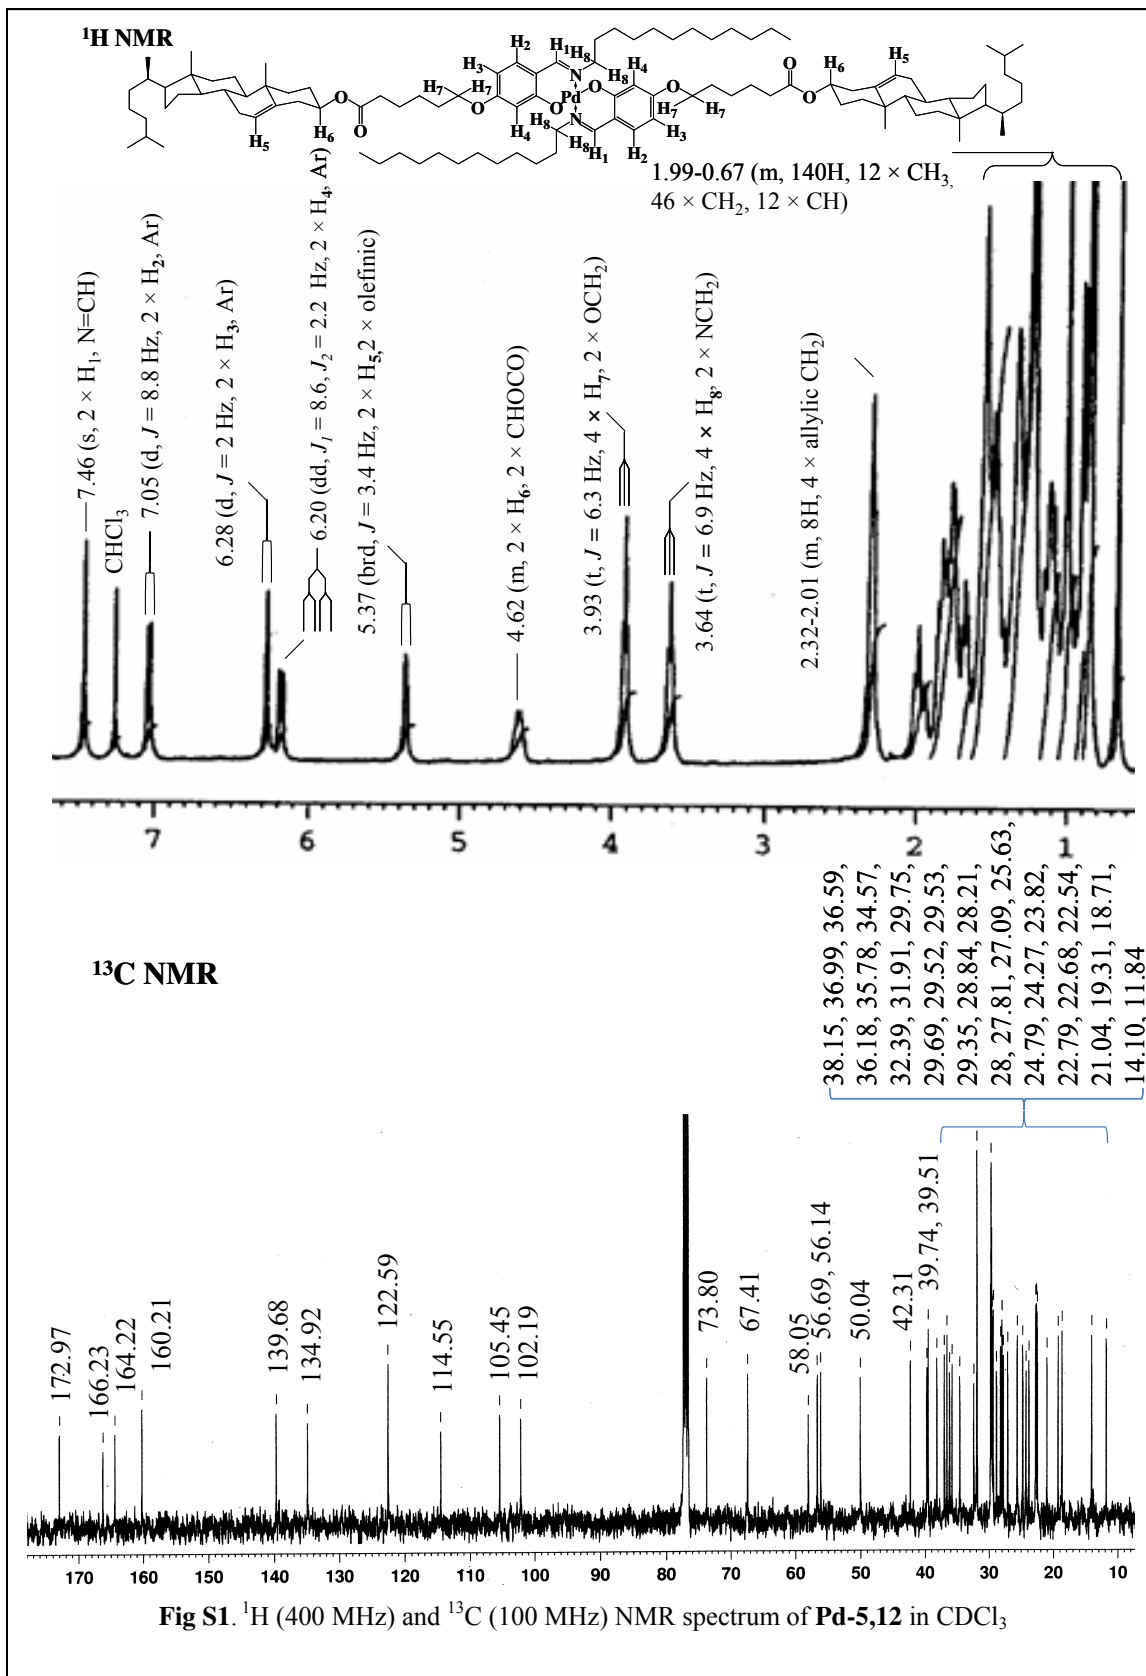

### III. Cyclic voltammograms and their UV spectra.

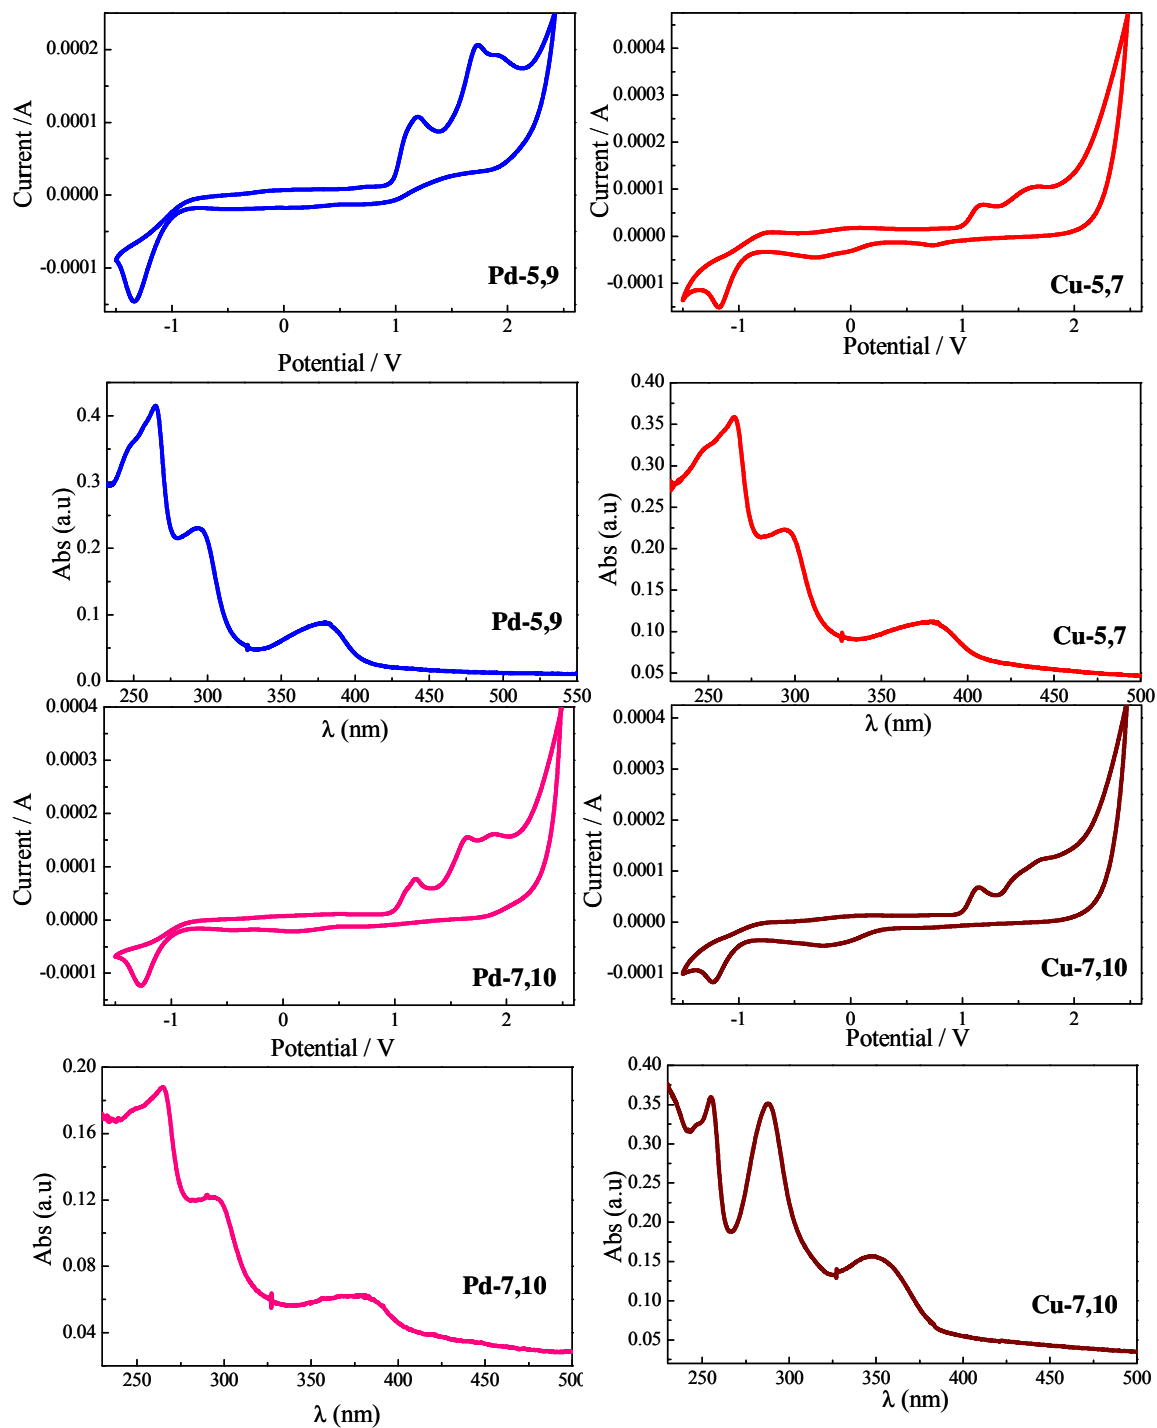

Fig S2 Cyclic voltammograms and their UV absorption spectra ( $10^{-3}$  M in  $\text{CH}_2\text{Cl}_2$ ).

**Table S1.** Temperature dependant CD signal data obtained for the N\* phase of complex **Cu-3,6**

| T/°C | CD signals            |           |
|------|-----------------------|-----------|
|      | $\lambda_{\max}$ (nm) | CD (mdeg) |
| 110  | 399, 279              | 104, 26   |
| 115  | 399, 277              | 117, 28   |
| 120  | 397, 277              | 127, 26   |
| 125  | 399, 277              | 126, 23   |
| 130  | 401, 276              | 129, 28   |
| 135  | 400, 276              | 135, 20   |
| 140  | 400, 279              | 140, 27   |
| 145  | 400, 279              | 143, 24   |
| 150  | 400, 280              | 150, 26   |
| 155  | 401, 280              | 147, 28   |
| 165  | 400, 278              | 152, 22   |

#### IV. General synthetic procedure and analytical datas.

##### IV.1. General procedure for the synthesis of bis [4-((4-cholesterylalkonate)oxy)-N-(n-alkyl)salicyaldiminato]palladium (II) complexes (Pd-n,R seires).

A mixture of dimer-like (**L-n,R**) compound (0.30 mmol, 1 equiv.), palladium (II) chloride (0.55 equiv., 0.16 mmol) and anhyd.  $K_2CO_3$  (0.44 mmol, 2 equiv.) in dry acetonitrile was refluxed for 2 h. A pale yellow colored precipitate obtained was collected by filtration and washed with excess of ethanol to remove  $K_2CO_3$ . The crude complex was further purified by repeated recrystallization from a mixture of  $CHCl_3$ -ethanol (1:9) to get a pure pale greenish colored complex.

##### **Pd-3,6**

A pale greenish solid; yield: 71 %; IR (KBr Pellet):  $\nu_{\max}$  in  $cm^{-1}$  2949, 1737, 1625, 1529, 1239, 1171;  $^1H$  NMR (400MHz,  $CDCl_3$ ): 7.47 (s, 2H, N=CH), 7.06 (d,  $J = 8.7$  Hz, 2H, Ar), 6.28 (d,  $J = 2.2$  Hz, 2H, Ar), 6.20 (dd,  $J_1 = 8.7$  Hz,  $J_2 = 2.3$  Hz, 2H, Ar), 5.37 (brd,  $J = 3.8$  Hz, 2H, 2  $\times$  olefinic), 4.63 (m, 2H, 2  $\times$  CHOCO), 3.98 (t,  $J = 5.8$  Hz, 4H, 2  $\times$   $OCH_2$ ), 3.64 (t,  $J = 6.9$  Hz, 4H, 2  $\times$   $NCH_2$ ), 2.50-2.08 (m, 8H, 4  $\times$  allylic methylene), 1.99-1.05 (m, 72H, 30  $\times$   $CH_2$ , 12  $\times$  CH), 1.01 (s, 6H, 2  $\times$   $CH_3$ ), 0.98 (d,  $J = 5.4$  Hz, 6H, 2  $\times$   $CH_3$ ), 0.95 (s, 6H, 2  $\times$   $CH_3$ ), 0.87 (d,  $J = 1.5$  Hz, 6H, 2  $\times$   $CH_3$ ), 0.85 (d,  $J = 1.6$  Hz, 6H, 2  $\times$   $CH_3$ ), 0.67 (s, 6H, 2  $\times$   $CH_3$ ); MS (FAB+): m/z calcd for  $C_{88}H_{136}N_2O_8Pd$ : 1455.4, Found: 1454.6.

##### **Pd-3,7**

A pale greenish solid; yield: 72 %; IR (KBr Pellet):  $\nu_{\max}$  in  $cm^{-1}$  2923, 1734, 1607, 1530, 1233, 1175;  $^1H$  NMR (400MHz,  $CDCl_3$ ): 7.47 (s, 2H, N=CH), 7.05 (d,  $J = 8.7$  Hz, 2H, Ar), 6.28 (d,  $J = 2.2$  Hz, 2H, Ar), 6.18 (dd,  $J_1 = 8.7$  Hz,  $J_2 = 2.3$  Hz, 2H, Ar), 5.37 (brd,  $J = 3.2$  Hz, 2H, 2  $\times$  olefinic), 4.63 (m, 2H, 2  $\times$  CHOCO), 3.97 (t,  $J = 5.9$  Hz, 4H, 2  $\times$

OCH<sub>2</sub>), 3.62 (t,  $J = 6.6$  Hz, 4H, 2 × NCH<sub>2</sub>), 2.50-2.08 (m, 8H, 4 × allylic methylene), 1.99-1.05 (m, 76H, 32 × CH<sub>2</sub>, 12 × CH), 1.01 (s, 6H, 2 × CH<sub>3</sub>), 0.98 (d,  $J = 5.4$  Hz, 6H, 2 × CH<sub>3</sub>), 0.95 (s, 6H, 2 × CH<sub>3</sub>), 0.87 (d,  $J = 1.5$  Hz, 6H, 2 × CH<sub>3</sub>), 0.85 (d,  $J = 1.6$  Hz, 6H, 2 × CH<sub>3</sub>), 0.67 (s, 6H, 2 × CH<sub>3</sub>); MS (FAB+):  $m/z$  calcd for C<sub>90</sub>H<sub>140</sub>N<sub>2</sub>O<sub>8</sub>Pd: 1483.5, Found: 1483.5.

### Pd-3,8

A pale greenish solid; yield: 79 %; IR (KBr Pellet):  $\nu_{\max}$  in cm<sup>-1</sup> 2931, 1732, 1604, 1531, 1221, 1173; <sup>1</sup>H NMR (400MHz, CDCl<sub>3</sub>): 7.46 (s, 2H, N=CH), 7.05 (d,  $J = 8.8$  Hz, 2H, Ar), 6.28 (d,  $J = 2.2$  Hz, 2H, Ar), 6.20 (dd,  $J_1 = 8.2$  Hz,  $J_2 = 2.3$  Hz, 2H, Ar), 5.37 (brd,  $J = 3.6$  Hz, 2H, 1 × olefinic), 4.63 (m, 2H, 2 × CHOCO), 3.98 (t,  $J = 5.9$  Hz, 4H, 2 × OCH<sub>2</sub>), 3.64 (t,  $J = 6.8$  Hz, 4H, 2 × NCH<sub>2</sub>), 2.50-2.08 (m, 8H, 4 × allylic methylene), 1.99-1.05 (m, 80H, 34 × CH<sub>2</sub>, 12 × CH), 1.01 (s, 6H, 2 × CH<sub>3</sub>), 0.97 (d,  $J = 5.8$  Hz, 6H, 2 × CH<sub>3</sub>), 0.91 (s, 6H, 2 × CH<sub>3</sub>), 0.87 (d,  $J = 1.7$  Hz, 6H, 2 × CH<sub>3</sub>), 0.85 (d,  $J = 1.8$  Hz, 6H, 2 × CH<sub>3</sub>), 0.67 (s, 6H, 2 × CH<sub>3</sub>); MS (FAB+):  $m/z$  calcd for C<sub>92</sub>H<sub>144</sub>N<sub>2</sub>O<sub>8</sub>Pd: 1511.5, Found: 1511.4.

### Pd-3,9

A pale greenish solid; yield: 69 %; IR (KBr Pellet):  $\nu_{\max}$  in cm<sup>-1</sup> 2930, 1731, 1605, 1533, 1221, 1172; <sup>1</sup>H NMR (400MHz, CDCl<sub>3</sub>): 7.46 (s, 2H, N=CH), 7.05 (d,  $J = 8.8$  Hz, 2H, Ar), 6.28 (d,  $J = 2.2$  Hz, 2H, Ar), 6.20 (dd,  $J_1 = 8.2$  Hz,  $J_2 = 2.2$  Hz, 2H, Ar), 5.37 (brd,  $J = 3.6$  Hz, 2H, 2 × olefinic), 4.63 (m, 2H, 2 × CHOCO), 3.98 (t,  $J = 5.9$  Hz, 4H, 2 × OCH<sub>2</sub>), 3.64 (t,  $J = 6.8$  Hz, 4H, 2 × NCH<sub>2</sub>), 2.50-2.08 (m, 8H, 4 × allylic methylene), 1.99-1.05 (m, 84H, 36 × CH<sub>2</sub>, 12 × CH), 1.01 (s, 6H, 2 × CH<sub>3</sub>), 0.97 (d,  $J = 5.4$  Hz, 6H, 2 × CH<sub>3</sub>), 0.91 (s, 6H, 2 × CH<sub>3</sub>), 0.87 (d,  $J = 1.7$  Hz, 6H, 2 × CH<sub>3</sub>), 0.85 (d,  $J = 1.7$  Hz, 6H, 2 × CH<sub>3</sub>), 0.67 (s, 6H, 2 × CH<sub>3</sub>); MS (FAB+):  $m/z$  calcd for C<sub>94</sub>H<sub>148</sub>N<sub>2</sub>O<sub>8</sub>Pd: 1539.0, Found: 1538.9.

### Pd-3,10

A pale greenish solid; yield: 72 %; IR (KBr Pellet):  $\nu_{\max}$  in cm<sup>-1</sup> 2931, 1732, 1624, 1534, 1256, 1124; <sup>1</sup>H NMR (400MHz, CDCl<sub>3</sub>): 7.46 (s, 2H, N=CH), 7.05 (d,  $J = 8.8$  Hz, 2H, Ar), 6.28 (d,  $J = 2.0$  Hz, 2H, Ar), 6.19 (dd,  $J_1 = 8.8$  Hz,  $J_2 = 2.2$  Hz, 2H, Ar), 5.37 (brd,  $J = 3.6$  Hz, 2H, 2 × olefinic), 4.63 (m, 2H, 2 × CHOCO), 3.98 (t,  $J = 5.8$  Hz, 4H, 2 × OCH<sub>2</sub>), 3.64 (t,  $J = 6.8$  Hz, 4H, 2 × NCH<sub>2</sub>), 2.50-2.08 (m, 8H, 4 × allylic methylene), 1.99-1.05 (m, 88H, 38 × CH<sub>2</sub>, 12 × CH), 1.01 (s, 6H, 2 × CH<sub>3</sub>), 0.97 (d,  $J = 5.8$  Hz, 6H, 2 × CH<sub>3</sub>), 0.91 (s, 6H, 2 × CH<sub>3</sub>), 0.87 (d,  $J = 1.7$  Hz, 6H, 2 × CH<sub>3</sub>), 0.85 (d,  $J = 1.6$  Hz, 6H, 2 × CH<sub>3</sub>), 0.67 (s, 6H, 2 × CH<sub>3</sub>); <sup>13</sup>C NMR (100MHz, CDCl<sub>3</sub>): 172.52, 166.13, 164.47, 160.2, 139.6, 134.95, 122.65, 114.63, 108.97, 102.28, 74.11, 66.51, 58.05, 56.66, 56.08, 49.98, 42.28, 39.49, 38.11, 36.95, 36.56, 36.15, 35.76, 32.35, 31.87, 31.14, 29.34, 28, 27.04, 24.26, 23.81, 22.68, 21.01, 19.3, 18.68, 14.12, 11.83; MS (FAB+):  $m/z$  calcd for C<sub>96</sub>H<sub>152</sub>N<sub>2</sub>O<sub>8</sub>Pd: 1567.6, Found: 1567.3.

### Pd-3,11

A pale greenish solid; yield: 68 %; IR (KBr Pellet):  $\nu_{\max}$  in cm<sup>-1</sup> 2927, 1733, 1606, 1529, 1220, 1172; <sup>1</sup>H NMR (400MHz, CDCl<sub>3</sub>): 7.46 (s, 2H, N=CH), 7.05 (d,  $J = 8.8$  Hz, 2H, Ar), 6.28 (d,  $J = 2.2$  Hz, 2H, Ar), 6.20 (dd,  $J_1 = 8.7$  Hz,  $J_2 = 2.3$  Hz, 2H, Ar), 5.37 (brd,  $J$

= 3.7 Hz, 2H, 2 × olefinic), 4.63 (m, 2H, 2 × CHOCO), 3.98 (t,  $J = 5.9$  Hz, 4H, 2 × OCH<sub>2</sub>), 3.64 (t,  $J = 7.0$  Hz, 4H, 2 × NCH<sub>2</sub>), 2.50-2.08 (m, 8H, 4 × allylic methylene), 1.99-1.05 (m, 92H, 40 × CH<sub>2</sub>, 12 × CH), 1.01 (s, 6H, 2 × CH<sub>3</sub>), 0.97 (d,  $J = 5.8$  Hz, 6H, 2 × CH<sub>3</sub>), 0.93 (s, 6H, 2 × CH<sub>3</sub>), 0.87 (d,  $J = 1.6$  Hz, 6H, 2 × CH<sub>3</sub>), 0.85 (d,  $J = 1.7$  Hz, 6H, 2 × CH<sub>3</sub>), 0.67 (s, 6H, 2 × CH<sub>3</sub>); MS (FAB+):  $m/z$  calcd for C<sub>98</sub>H<sub>156</sub>N<sub>2</sub>O<sub>8</sub>Pd: 1595.6, Found: 1595.

### **Pd-3,12**

A pale greenish solid; yield: 70 %; IR (KBr Pellet):  $\nu_{\max}$  in cm<sup>-1</sup> 2924, 1733, 1607, 1527, 1236, 1172; <sup>1</sup>H NMR (400MHz, CDCl<sub>3</sub>): 7.46 (s, 2H, N=CH), 7.05 (d,  $J = 8.8$  Hz, 2H, Ar), 6.28 (d,  $J = 2.2$  Hz, 2H, Ar), 6.20 (dd,  $J_1 = 8.7$  Hz,  $J_2 = 2.3$  Hz, 2H, Ar), 5.37 (brd,  $J = 3.2$  Hz, 2H, 2 × olefinic), 4.63 (m, 2H, 2 × CHOCO), 3.98 (t,  $J = 5.9$  Hz, 4H, 2 × OCH<sub>2</sub>), 3.64 (t,  $J = 6.6$  Hz, 4H, 2 × NCH<sub>2</sub>), 2.50-2.08 (m, 8H, 4 × allylic methylene), 1.99-1.05 (m, 96H, 42 × CH<sub>2</sub>, 12 × CH), 1.01 (s, 6H, 2 × CH<sub>3</sub>), 0.97 (d,  $J = 5.4$  Hz, 6H, 2 × CH<sub>3</sub>), 0.93 (s, 6H, 2 × CH<sub>3</sub>), 0.87 (d,  $J = 1.5$  Hz, 6H, 2 × CH<sub>3</sub>), 0.85 (d,  $J = 1.6$  Hz, 6H, 2 × CH<sub>3</sub>), 0.67 (s, 6H, 2 × CH<sub>3</sub>); MS (FAB+):  $m/z$  calcd for C<sub>100</sub>H<sub>160</sub>N<sub>2</sub>O<sub>4</sub>Pd: 1623.6, Found: 1623.9.

### **Pd-3,16**

A pale greenish solid; yield: 68 %; IR (KBr Pellet):  $\nu_{\max}$  in cm<sup>-1</sup> 2922, 1733, 1604, 1528, 1221, 1171; <sup>1</sup>H NMR (400MHz, CDCl<sub>3</sub>): 7.46 (s, 2H, N=CH), 7.05 (d,  $J = 8.8$  Hz, 2H, Ar), 6.28 (d,  $J = 2.0$  Hz, 2H, Ar), 6.20 (dd,  $J_1 = 8.6$  Hz,  $J_2 = 2.2$  Hz, 2H, Ar), 5.37 (brd,  $J = 3.4$  Hz, 2H, 2 × olefinic), 4.63 (m, 2H, 2 × CHOCO), 3.98 (t,  $J = 5.9$  Hz, 4H, 2 × OCH<sub>2</sub>), 3.64 (t,  $J = 6.8$  Hz, 4H, 2 × NCH<sub>2</sub>), 2.48-2.01 (m, 8H, 4 × allylic methylene), 1.99-1.05 (m, 112H, 50 × CH<sub>2</sub>, 12 × CH), 1.01 (s, 6H, 2 × CH<sub>3</sub>), 0.97 (d,  $J = 5.5$  Hz, 6H, 2 × CH<sub>3</sub>), 0.91 (s, 6H, 2 × CH<sub>3</sub>), 0.87 (d,  $J = 1.8$  Hz, 6H, 2 × CH<sub>3</sub>), 0.85 (d,  $J = 1.7$  Hz, 6H, 2 × CH<sub>3</sub>), 0.67 (s, 6H, 2 × CH<sub>3</sub>); MS (FAB+):  $m/z$  calcd for C<sub>108</sub>H<sub>177</sub>N<sub>2</sub>O<sub>8</sub>Pd (M+1): 1736.7, Found: 1736.

### **Pd-4,6**

A pale greenish solid; yield: 74 %; IR (KBr Pellet):  $\nu_{\max}$  in cm<sup>-1</sup> 2935, 1734, 1604, 1529, 1219, 1172; <sup>1</sup>H NMR (400MHz, CDCl<sub>3</sub>): 7.50 (s, 2H, N=CH), 7.05 (d,  $J = 8.7$  Hz, 2H, Ar), 6.28 (d,  $J = 2.2$ , 2H, Ar), 6.18 (dd,  $J_1 = 8.7$  Hz,  $J_2 = 2.3$  Hz, 2H, Ar), 5.40 (brd,  $J = 3.2$  Hz, 2H, 2 × olefinic), 4.65 (m, 2H, 2 × CHOCO), 3.97 (t,  $J = 5.9$  Hz, 4H, 2 × OCH<sub>2</sub>), 3.62 (t,  $J = 6.6$  Hz, 4H, 2 × NCH<sub>2</sub>), 2.49-2.08 (m, 8H, 4 × allylic methylene), 1.99-1.05 (m, 76H, 32 × CH<sub>2</sub>, 12 × CH), 1.01 (s, 6H, 2 × CH<sub>3</sub>), 0.98 (d,  $J = 5.4$  Hz, 6H, 2 × CH<sub>3</sub>), 0.95 (s, 6H, 2 × CH<sub>3</sub>), 0.87 (d,  $J = 1.5$  Hz, 6H, 2 × CH<sub>3</sub>), 0.85 (d,  $J = 1.6$  Hz, 6H, 2 × CH<sub>3</sub>), 0.67 (s, 6H, 2 × CH<sub>3</sub>); <sup>13</sup>C NMR (100MHz, CDCl<sub>3</sub>): 172.98, 166.21, 164.38, 160.21, 139.68, 134.93, 122.59, 114.55, 105.44, 102.19, 73.8, 67.4, 58.08, 56.69, 56.14, 50.04, 42.31, 39.73, 39.51, 38.15, 36.99, 36.59, 36.18, 35.78, 34.56, 32.43, 31.90, 29.17, 28.84, 28.21, 28, 27.81, 27.07, 25.61, 24.78, 24.27, 23.82, 22.79, 22.62, 21.03, 19.31, 18.70, 14.08, 11.84; MS (FAB+):  $m/z$  calcd for C<sub>90</sub>H<sub>142</sub>N<sub>2</sub>O<sub>8</sub>Pd (M+2): 1487.5, Found: 1487.3.

### Pd-5,6

A pale greenish solid; yield: 79 %; IR (KBr Pellet):  $\nu_{\max}$  in  $\text{cm}^{-1}$  2935, 1726, 1608, 1531, 1220, 1174;  $^1\text{H}$  NMR (400MHz,  $\text{CDCl}_3$ ): 7.47 (s, 2H, N=CH), 7.05 (d,  $J = 8.8$  Hz, 2H, Ar), 6.28 (d,  $J = 2.1$  Hz, 2H, Ar), 6.20 (dd,  $J_1 = 8.6$  Hz,  $J_2 = 2.2$  Hz, 2H, Ar), 5.37 (brd,  $J = 4.0$  Hz, 2H, 2  $\times$  olefinic), 4.65 (m, 2H, 2  $\times$  CHOCO), 3.93 (t,  $J = 6.3$  Hz, 4H, 2  $\times$  OCH<sub>2</sub>), 3.64 (t,  $J = 7.0$  Hz, 4H, 2  $\times$  NCH<sub>2</sub>), 2.32-2.08 (m, 8H, 4  $\times$  allylic methylene), 1.99-1.05 (m, 80H, 34  $\times$  CH<sub>2</sub>, 12  $\times$  CH), 1.01 (s, 6H, 2  $\times$  CH<sub>3</sub>), 0.98 (d,  $J = 5.1$  Hz, 6H, 2  $\times$  CH<sub>3</sub>), 0.95 (s, 6H, 2  $\times$  CH<sub>3</sub>), 0.87 (d,  $J = 1.6$  Hz, 6H, 2  $\times$  CH<sub>3</sub>), 0.85 (d,  $J = 1.7$  Hz, 6H, 2  $\times$  CH<sub>3</sub>), 0.67 (s, 6H, 2  $\times$  CH<sub>3</sub>); MS (FAB+):  $m/z$  calcd for  $\text{C}_{92}\text{H}_{144}\text{N}_2\text{O}_8\text{Pd}$  : 1511.5, Found: 1511.0.

### Pd-5,7

A pale greenish solid; yield: 73 %; IR (KBr Pellet):  $\nu_{\max}$  in  $\text{cm}^{-1}$  2934, 1728, 1607, 1530, 1224, 1197;  $^1\text{H}$  NMR (400MHz,  $\text{CDCl}_3$ ): 7.47 (s, 2H, N=CH), 7.05 (d,  $J = 8.8$  Hz, 2H, Ar), 6.28 (d,  $J = 2.2$  Hz, 2H, Ar), 6.20 (dd,  $J_1 = 8.7$  Hz,  $J_2 = 2.3$  Hz, 2H, Ar), 5.37 (brd,  $J = 3.3$  Hz, 2H, 2  $\times$  olefinic), 4.65 (m, 2H, 2  $\times$  CHOCO), 3.94 (t,  $J = 6.3$  Hz, 4H, 2  $\times$  OCH<sub>2</sub>), 3.64 (t,  $J = 7.1$  Hz, 4H, 2  $\times$  NCH<sub>2</sub>), 2.32-2.01 (m, 8H, 4  $\times$  allylic methylene), 1.99-1.05 (m, 84H, 36  $\times$  CH<sub>2</sub>, 12  $\times$  CH), 1.01 (s, 6H, 2  $\times$  CH<sub>3</sub>), 0.98 (d,  $J = 6.2$  Hz, 6H, 2  $\times$  CH<sub>3</sub>), 0.92 (s, 6H, 2  $\times$  CH<sub>3</sub>), 0.87 (d,  $J = 2.0$  Hz, 6H, 2  $\times$  CH<sub>3</sub>), 0.85 (d,  $J = 1.8$  Hz, 6H, 2  $\times$  CH<sub>3</sub>), 0.67 (s, 6H, 2  $\times$  CH<sub>3</sub>); MS (FAB+):  $m/z$  calcd for  $\text{C}_{94}\text{H}_{149}\text{N}_2\text{O}_8\text{Pd}$  (M+1): 1540.5, Found: 1540.3.

### Pd-5,8

A pale greenish solid; yield: 71 %; IR (KBr Pellet):  $\nu_{\max}$  in  $\text{cm}^{-1}$  2937, 1735, 1624, 1529, 1236, 1173;  $^1\text{H}$  NMR (400MHz,  $\text{CDCl}_3$ ): 7.47 (s, 2H, N=CH), 7.05 (d,  $J = 8.8$  Hz, 2H, Ar), 6.28 (d,  $J = 2.2$  Hz, 2H, Ar), 6.20 (dd,  $J_1 = 8.6$  Hz,  $J_2 = 2.3$  Hz, 2H, Ar), 5.37 (brd,  $J = 3.7$  Hz, 2H, 2  $\times$  olefinic), 4.62 (m, 2H, 2  $\times$  CHOCO), 3.94 (t,  $J = 6.3$  Hz, 4H, 2  $\times$  OCH<sub>2</sub>), 3.64 (t,  $J = 6.9$  Hz, 4H, 2  $\times$  NCH<sub>2</sub>), 2.32-2.01 (m, 8H, 4  $\times$  allylic methylene), 1.99-1.05 (m, 88H, 38  $\times$  CH<sub>2</sub>, 12  $\times$  CH), 1.01 (s, 6H, 2  $\times$  CH<sub>3</sub>), 0.96 (d,  $J = 6.4$  Hz, 6H, 2  $\times$  CH<sub>3</sub>), 0.92 (s, 6H, 2  $\times$  CH<sub>3</sub>), 0.87 (d,  $J = 1.7$  Hz, 6H, 2  $\times$  CH<sub>3</sub>), 0.85 (d,  $J = 1.8$  Hz, 6H, 2  $\times$  CH<sub>3</sub>), 0.67 (s, 6H, 2  $\times$  CH<sub>3</sub>); MS (FAB+):  $m/z$  calcd for  $\text{C}_{96}\text{H}_{152}\text{N}_2\text{O}_8\text{Pd}$ : 1567.6, Found: 1567.4.

### Pd-5,9

A pale greenish solid; yield: 79 %; IR (KBr Pellet):  $\nu_{\max}$  in  $\text{cm}^{-1}$  2933, 1732, 1608, 1530, 1235, 1174;  $^1\text{H}$  NMR (400MHz,  $\text{CDCl}_3$ ): 7.47 (s, 2H, N=CH), 7.05 (d,  $J = 8.8$  Hz, 2H, Ar), 6.28 (d,  $J = 2.1$  Hz, 2H, Ar), 6.20 (dd,  $J_1 = 8.7$  Hz,  $J_2 = 2.3$  Hz, 2H, Ar), 5.37 (brd,  $J = 3.7$  Hz, 2H, 2  $\times$  olefinic), 4.62 (m, 2H, 2  $\times$  CHOCO), 3.93 (t,  $J = 6.3$  Hz, 4H, 2  $\times$  OCH<sub>2</sub>), 3.64 (t,  $J = 7.0$  Hz, 4H, 2  $\times$  NCH<sub>2</sub>), 2.32-2.01 (m, 8H, 4  $\times$  allylic methylene), 1.99-1.05 (m, 92H, 40  $\times$  CH<sub>2</sub>, 12  $\times$  CH), 1.01 (s, 6H, 2  $\times$  CH<sub>3</sub>), 0.97 (d,  $J = 6.4$  Hz, 6H, 2  $\times$  CH<sub>3</sub>), 0.92 (s, 6H, 2  $\times$  CH<sub>3</sub>), 0.87 (d,  $J = 1.7$  Hz, 6H, 2  $\times$  CH<sub>3</sub>), 0.85 (d,  $J = 1.7$  Hz, 6H, 2  $\times$  CH<sub>3</sub>), 0.67 (s, 6H, 2  $\times$  CH<sub>3</sub>); MS (FAB+):  $m/z$  calcd for  $\text{C}_{98}\text{H}_{156}\text{N}_2\text{O}_8\text{Pd}$ : 1595.6, Found: 1595.4.

### Pd-5,10

A pale greenish solid; yield: 80 %; IR (KBr Pellet):  $\nu_{\max}$  in  $\text{cm}^{-1}$  2930, 1732, 1607, 1530, 1236, 1174;  $^1\text{H}$  NMR (400MHz,  $\text{CDCl}_3$ ): 7.46 (s, 2H, N=CH), 7.05 (d,  $J = 8.8$  Hz, 2H, Ar), 6.28 (d,  $J = 2.1$  Hz, 2H, Ar), 6.20 (dd,  $J_1 = 8.7$  Hz,  $J_2 = 2.3$  Hz, 2H, Ar), 5.37 (brd,  $J = 3.6$  Hz, 2H, 2  $\times$  olefinic), 4.62 (m, 2H, 2  $\times$  CHOCO), 3.93 (t,  $J = 6.2$  Hz, 4H, 2  $\times$  OCH<sub>2</sub>), 3.64 (t,  $J = 6.8$  Hz, 4H, 2  $\times$  NCH<sub>2</sub>), 2.32-2.01 (m, 8H, 4  $\times$  allylic methylene), 1.99-1.05 (m, 96H, 42  $\times$  CH<sub>2</sub>, 12  $\times$  CH), 1.01 (s, 6H, 2  $\times$  CH<sub>3</sub>), 0.97 (d,  $J = 6.3$  Hz, 6H, 2  $\times$  CH<sub>3</sub>), 0.92 (s, 6H, 2  $\times$  CH<sub>3</sub>), 0.87 (d,  $J = 1.8$  Hz, 6H, 2  $\times$  CH<sub>3</sub>), 0.85 (d,  $J = 1.8$  Hz, 6H, 2  $\times$  CH<sub>3</sub>), 0.67 (s, 6H, 2  $\times$  CH<sub>3</sub>); MS (FAB+):  $m/z$  calcd for  $\text{C}_{100}\text{H}_{160}\text{N}_2\text{O}_8\text{Pd}$ : 1623.6, Found: 1623.4.

### Pd-5,11

A pale greenish solid; yield: 83 %; IR (KBr Pellet):  $\nu_{\max}$  in  $\text{cm}^{-1}$  2927, 1736, 1607, 1535, 1239, 1198;  $^1\text{H}$  NMR (400MHz,  $\text{CDCl}_3$ ): 7.46 (s, 2H, N=CH), 7.05 (d,  $J = 8.8$  Hz, 2H, Ar), 6.28 (d,  $J = 2.0$  Hz, 2H, Ar), 6.20 (dd,  $J_1 = 8.6$  Hz,  $J_2 = 2.2$  Hz, 2H, Ar), 5.37 (brd,  $J = 3.6$  Hz, 2H, 2  $\times$  olefinic), 4.62 (m, 2H, 2  $\times$  CHOCO), 3.93 (t,  $J = 6.2$  Hz, 4H, 2  $\times$  OCH<sub>2</sub>), 3.64 (t,  $J = 6.8$  Hz, 4H, 2  $\times$  NCH<sub>2</sub>), 2.32-2.01 (m, 8H, 4  $\times$  allylic methylene), 1.99-1.05 (m, 100H, 44  $\times$  CH<sub>2</sub>, 12  $\times$  CH), 1.01 (s, 6H, 2  $\times$  CH<sub>3</sub>), 0.97 (d,  $J = 6.3$  Hz, 6H, 2  $\times$  CH<sub>3</sub>), 0.92 (s, 6H, 2  $\times$  CH<sub>3</sub>), 0.87 (d,  $J = 1.8$  Hz, 6H, 2  $\times$  CH<sub>3</sub>), 0.85 (d,  $J = 1.5$  Hz, 6H, 2  $\times$  CH<sub>3</sub>), 0.67 (s, 6H, 2  $\times$  CH<sub>3</sub>); MS (FAB+):  $m/z$  calcd for  $\text{C}_{102}\text{H}_{164}\text{N}_2\text{O}_8\text{Pd}$ : 1651.7, Found: 1651.9.

### Pd-5,12

A pale greenish solid; yield: 81 %; IR (KBr Pellet):  $\nu_{\max}$  in  $\text{cm}^{-1}$  2925, 1734, 1608, 1533, 1221, 1171;  $^1\text{H}$  NMR (400MHz,  $\text{CDCl}_3$ ): 7.46 (s, 2H, N=CH), 7.05 (d,  $J = 8.8$  Hz, 2H, Ar), 6.28 (d,  $J = 2.0$  Hz, 2H, Ar), 6.20 (dd,  $J_1 = 8.6$  Hz,  $J_2 = 2.2$  Hz, 2H, Ar), 5.37 (brd,  $J = 3.4$  Hz, 2H, 2  $\times$  olefinic), 4.62 (m, 2H, 2  $\times$  CHOCO), 3.93 (t,  $J = 6.3$  Hz, 4H, 2  $\times$  OCH<sub>2</sub>), 3.64 (t,  $J = 6.9$  Hz, 4H, 2  $\times$  NCH<sub>2</sub>), 2.32-2.01 (m, 8H, 4  $\times$  allylic methylene), 1.99-1.05 (m, 104H, 46  $\times$  CH<sub>2</sub>, 12  $\times$  CH), 1.01 (s, 6H, 2  $\times$  CH<sub>3</sub>), 0.97 (d,  $J = 6.3$  Hz, 6H, 2  $\times$  CH<sub>3</sub>), 0.92 (s, 6H, 2  $\times$  CH<sub>3</sub>), 0.87 (d,  $J = 1.5$  Hz, 6H, 2  $\times$  CH<sub>3</sub>), 0.85 (d,  $J = 1.4$  Hz, 6H, 2  $\times$  CH<sub>3</sub>), 0.67 (s, 6H, 2  $\times$  CH<sub>3</sub>);  $^{13}\text{C}$  NMR (100MHz,  $\text{CDCl}_3$ ): 172.97, 166.23, 164.22, 160.21, 139.68, 134.92, 122.59, 114.55, 105.45, 102.19, 73.8, 67.41, 58.05, 56.69, 56.14, 50.04, 42.31, 39.74, 39.51, 38.15, 36.99, 36.59, 36.18, 35.78, 34.57, 32.39, 31.91, 29.75, 29.69, 29.53, 29.35, 28.84, 28.21, 28, 27.81, 27.09, 25.63, 24.79, 24.27, 23.82, 22.79, 22.68, 22.54, 21.04, 19.31, 18.71, 14.1, 11.84.; MS (FAB+):  $m/z$  calcd for  $\text{C}_{104}\text{H}_{168}\text{N}_2\text{O}_8\text{Pd}$ : 1679.7, Found: 1679.

### Pd-5,16

A pale greenish solid; yield: 79 %; IR (KBr Pellet):  $\nu_{\max}$  in  $\text{cm}^{-1}$  2921, 1726, 1605, 1530, 1223, 1128;  $^1\text{H}$  NMR (400MHz,  $\text{CDCl}_3$ ): 7.46 (s, 2H, N=CH), 7.05 (d,  $J = 8.8$  Hz, 2H, Ar), 6.28 (d,  $J = 2.2$  Hz, 2H, Ar), 6.20 (dd,  $J_1 = 8.6$  Hz,  $J_2 = 2.2$  Hz, 2H, Ar), 5.37 (brd,  $J = 3.4$  Hz, 2H, 2  $\times$  olefinic), 4.62 (m, 2H, 2  $\times$  CHOCO), 3.93 (t,  $J = 6.3$  Hz, 4H, 2  $\times$  OCH<sub>2</sub>), 3.64 (t,  $J = 6.9$  Hz, 4H, 2  $\times$  NCH<sub>2</sub>), 2.32-2.01 (m, 8H, 4  $\times$  allylic methylene), 1.99-1.05 (m, 120H, 54  $\times$  CH<sub>2</sub>, 12  $\times$  CH), 1.01 (s, 6H, 2  $\times$  CH<sub>3</sub>), 0.97 (d,  $J = 6.3$  Hz, 6H, 2  $\times$  CH<sub>3</sub>), 0.92 (s, 6H, 2  $\times$  CH<sub>3</sub>), 0.87 (d,  $J = 1.8$  Hz, 6H, 2  $\times$  CH<sub>3</sub>), 0.85 (d,  $J = 1.8$  Hz,



6H, 2 × CH<sub>3</sub>), 0.67 (s, 6H, 2 × CH<sub>3</sub>); MS (FAB+): m/z calcd for C<sub>112</sub>H<sub>185</sub>N<sub>2</sub>O<sub>8</sub>Pd (M+1): 1792.4, Found: 1792.5.

#### **Pd-7,6**

A pale greenish solid; yield: 76 %; IR (KBr Pellet):  $\nu_{\max}$  in cm<sup>-1</sup> 2932, 1733, 1605, 1525, 1220, 1174; <sup>1</sup>H NMR (400MHz, CDCl<sub>3</sub>): 7.46 (s, 2H, N=CH), 7.05 (d, *J* = 8.8 Hz, 2H, Ar), 6.28 (d, *J* = 2.4 Hz, 2H, Ar), 6.20 (dd, *J*<sub>1</sub> = 8.6 Hz, *J*<sub>2</sub> = 2.2 Hz, 2H, Ar), 5.37 (brd, *J* = 3.7 Hz, 2H, 2 × olefinic), 4.62 (m, 2H, 2 × CHOCO), 3.95 (t, *J* = 6.4 Hz, 4H, 2 × OCH<sub>2</sub>), 3.64 (t, *J* = 7.0 Hz, 4H, 2 × NCH<sub>2</sub>), 2.31-2.01 (m, 8H, 4 × allylic methylene), 1.99-1.05 (m, 88H, 38 × CH<sub>2</sub>, 12 × CH), 1.01 (s, 6H, 2 × CH<sub>3</sub>), 0.97 (d, *J* = 6.4 Hz, 6H, 2 × CH<sub>3</sub>), 0.92 (s, 6H, 2 × CH<sub>3</sub>), 0.87 (d, *J* = 1.5 Hz, 6H, 2 × CH<sub>3</sub>), 0.85 (d, *J* = 1.6 Hz, 6H, 2 × CH<sub>3</sub>), 0.67 (s, 6H, 2 × CH<sub>3</sub>); MS (FAB+): m/z calcd for C<sub>96</sub>H<sub>152</sub>N<sub>2</sub>O<sub>8</sub>Pd: 1567.6, Found: 1567.4.

#### **Pd-7,7**

A pale greenish solid; yield: 79 %; IR (KBr Pellet):  $\nu_{\max}$  in cm<sup>-1</sup> 2931, 1731, 1605, 1530, 1222, 1174; <sup>1</sup>H NMR (400MHz, CDCl<sub>3</sub>): 7.46 (s, 2H, N=CH), 7.05 (d, *J* = 8.8 Hz, 2H, Ar), 6.28 (d, *J* = 2.1 Hz, 2H, Ar), 6.20 (dd, *J*<sub>1</sub> = 8.6 Hz, *J*<sub>2</sub> = 2.2 Hz, 2H, Ar), 5.37 (brd, *J* = 3.8 Hz, 2H, 2 × olefinic), 4.62 (m, 2H, 2 × CHOCO), 3.92 (t, *J* = 6.4 Hz, 4H, 2 × OCH<sub>2</sub>), 3.61 (t, *J* = 6.9 Hz, 4H, 2 × NCH<sub>2</sub>), 2.31-2.01 (m, 8H, 4 × allylic methylene), 1.99-1.05 (m, 92H, 40 × CH<sub>2</sub>, 12 × CH), 1.01 (s, 6H, 2 × CH<sub>3</sub>), 0.97 (d, *J* = 6.4 Hz, 6H, 2 × CH<sub>3</sub>), 0.92 (s, 6H, 2 × CH<sub>3</sub>), 0.87 (d, *J* = 1.6 Hz, 6H, 2 × CH<sub>3</sub>), 0.85 (d, *J* = 1.6 Hz, 6H, 2 × CH<sub>3</sub>), 0.67 (s, 6H, 2 × CH<sub>3</sub>); MS (FAB+): m/z calcd for C<sub>98</sub>H<sub>156</sub>N<sub>2</sub>O<sub>8</sub>Pd: 1595.6, Found: 1595.5.

#### **Pd-7,8**

A pale greenish solid; yield: 77 %; IR (KBr Pellet):  $\nu_{\max}$  in cm<sup>-1</sup> 2932, 1731, 1606, 1529, 1230, 1124; <sup>1</sup>H NMR (400MHz, CDCl<sub>3</sub>): 7.46 (s, 2H, N=CH), 7.05 (d, *J* = 8.8 Hz, 2H, Ar), 6.28 (d, *J* = 2.1 Hz, 2H, Ar), 6.20 (dd, *J*<sub>1</sub> = 8.6 Hz, *J*<sub>2</sub> = 2.2 Hz, 2H, Ar), 5.37 (brd, *J* = 3.4 Hz, 2H, 2 × olefinic), 4.62 (m, 2H, 2 × CHOCO), 3.92 (t, *J* = 6.4 Hz, 4H, 2 × OCH<sub>2</sub>), 3.61 (t, *J* = 6.9 Hz, 4H, 2 × NCH<sub>2</sub>), 2.31-2.01 (m, 8H, 4 × allylic methylene), 1.99-1.05 (m, 96H, 42 × CH<sub>2</sub>, 12 × CH), 1.01 (s, 6H, 2 × CH<sub>3</sub>), 0.97 (d, *J* = 6.3 Hz, 6H, 2 × CH<sub>3</sub>), 0.92 (s, 6H, 2 × CH<sub>3</sub>), 0.87 (d, *J* = 1.6 Hz, 6H, 2 × CH<sub>3</sub>), 0.85 (d, *J* = 1.8 Hz, 6H, 2 × CH<sub>3</sub>), 0.67 (s, 6H, 2 × CH<sub>3</sub>); MS (FAB+): m/z calcd for C<sub>100</sub>H<sub>160</sub>N<sub>2</sub>O<sub>8</sub>Pd: 1623.6, Found: 1623.9.

#### **Pd-7,9**

A pale greenish solid; yield: 79 %; IR (KBr Pellet):  $\nu_{\max}$  in cm<sup>-1</sup> 2932, 1736, 1605, 1530, 1220, 1175; <sup>1</sup>H NMR (400MHz, CDCl<sub>3</sub>): 7.46 (s, 2H, N=CH), 7.05 (d, *J* = 8.8 Hz, 2H, Ar), 6.28 (d, *J* = 1.8 Hz, 2H, Ar), 6.20 (dd, *J*<sub>1</sub> = 8.6 Hz, *J*<sub>2</sub> = 2.1 Hz, 2H, Ar), 5.37 (brd, *J* = 3.4 Hz, 2H, 1 × olefinic), 4.62 (m, 2H, 2 × CHOCO), 3.92 (t, *J* = 6.3 Hz, 4H, 2 × OCH<sub>2</sub>), 3.63 (t, *J* = 6.9 Hz, 4H, 2 × NCH<sub>2</sub>), 2.31-2.01 (m, 8H, 4 × allylic methylene), 1.99-1.05 (m, 100H, 44 × CH<sub>2</sub>, 12 × CH), 1.01 (s, 6H, 2 × CH<sub>3</sub>), 0.97 (d, *J* = 6.4 Hz, 6H, 2 × CH<sub>3</sub>), 0.92 (s, 6H, 2 × CH<sub>3</sub>), 0.87 (d, *J* = 1.5 Hz, 6H, 2 × CH<sub>3</sub>), 0.85 (d, *J* = 1.4 Hz, 6H, 2 × CH<sub>3</sub>), 0.67 (s, 6H, 2 × CH<sub>3</sub>); MS (FAB+): m/z calcd for C<sub>102</sub>H<sub>166</sub>N<sub>2</sub>O<sub>8</sub>Pd (M+2): 1653.6, Found: 1653.4.

### Pd-7,10

A pale greenish solid; yield: 68 %; IR (KBr Pellet):  $\nu_{\max}$  in  $\text{cm}^{-1}$  2933, 1736, 1624, 1530, 1221, 1175;  $^1\text{H}$  NMR (400MHz,  $\text{CDCl}_3$ ): 7.46 (s, 2H, N=CH), 7.05 (d,  $J = 8.8$  Hz, 2H, Ar), 6.28 (d,  $J = 1.7$  Hz, 2H, Ar), 6.20 (dd,  $J_1 = 8.6$  Hz,  $J_2 = 2.0$  Hz, 2H, Ar), 5.37 (brd,  $J = 3.7$  Hz, 2H, 2  $\times$  olefinic), 4.62 (m, 2H, 2  $\times$  CHOCO), 3.92 (t,  $J = 6.2$  Hz, 4H, 2  $\times$  OCH<sub>2</sub>), 3.63 (t,  $J = 7.0$  Hz, 4H, 2  $\times$  NCH<sub>2</sub>), 2.31-2.01 (m, 8H, 4  $\times$  allylic methylene), 1.99-1.05 (m, 104H, 46  $\times$  CH<sub>2</sub>, 12  $\times$  CH), 1.01 (s, 6H, 2  $\times$  CH<sub>3</sub>), 0.97 (d,  $J = 6.4$  Hz, 6H, 2  $\times$  CH<sub>3</sub>), 0.92 (s, 6H, 2  $\times$  CH<sub>3</sub>), 0.87 (d,  $J = 1.5$  Hz, 6H, 2  $\times$  CH<sub>3</sub>), 0.85 (d,  $J = 1.4$  Hz, 6H, 2  $\times$  CH<sub>3</sub>), 0.67 (s, 6H, 2  $\times$  CH<sub>3</sub>); MS (FAB+):  $m/z$  calcd for  $\text{C}_{104}\text{H}_{169}\text{N}_2\text{O}_8\text{Pd}$  (M+1): 1680.7, Found: 1680.2.

### Pd-7,11

A pale greenish solid; yield: 68 %; IR (KBr Pellet):  $\nu_{\max}$  in  $\text{cm}^{-1}$  2931, 1736, 1622, 1530, 1236, 1178;  $^1\text{H}$  NMR (400MHz,  $\text{CDCl}_3$ ): 7.46 (s, 2H, N=CH), 7.05 (d,  $J = 8.8$  Hz, 2H, Ar), 6.28 (d,  $J = 1.9$  Hz, 2H, Ar), 6.20 (dd,  $J_1 = 8.6$  Hz,  $J_2 = 2.0$  Hz, 2H, Ar), 5.37 (brd,  $J = 3.7$  Hz, 2H, 2  $\times$  olefinic), 4.62 (m, 2H, 2  $\times$  CHOCO), 3.92 (t,  $J = 6.2$  Hz, 4H, 2  $\times$  OCH<sub>2</sub>), 3.63 (t,  $J = 7.0$  Hz, 4H, 2  $\times$  NCH<sub>2</sub>), 2.31-2.01 (m, 8H, 4  $\times$  allylic methylene), 1.99-1.05 (m, 108H, 48  $\times$  CH<sub>2</sub>, 12  $\times$  CH), 1.01 (s, 6H, 2  $\times$  CH<sub>3</sub>), 0.97 (d,  $J = 6.3$  Hz, 6H, 2  $\times$  CH<sub>3</sub>), 0.92 (s, 6H, 2  $\times$  CH<sub>3</sub>), 0.87 (d,  $J = 1.5$  Hz, 6H, 2  $\times$  CH<sub>3</sub>), 0.85 (d,  $J = 1.3$  Hz, 6H, 2  $\times$  CH<sub>3</sub>), 0.67 (s, 6H, 2  $\times$  CH<sub>3</sub>); MS (FAB+):  $m/z$  calcd for  $\text{C}_{106}\text{H}_{172}\text{N}_2\text{O}_8\text{Pd}$ : 1707.7, Found: 1707.6.

### Pd-7,12

A pale greenish solid; yield: 69 %; IR (KBr Pellet):  $\nu_{\max}$  in  $\text{cm}^{-1}$  2922, 1735, 1607, 1533, 1221, 1175;  $^1\text{H}$  NMR (400MHz,  $\text{CDCl}_3$ ): 7.46 (s, 2H, N=CH), 7.05 (d,  $J = 8.8$  Hz, 2H, Ar), 6.28 (d,  $J = 2.0$  Hz, 2H, Ar), 6.20 (dd,  $J_1 = 8.4$  Hz,  $J_2 = 2.0$ , 2H, Ar), 5.37 (brd,  $J = 3.7$  Hz, 2H, 2  $\times$  olefinic), 4.62 (m, 2H, 2  $\times$  CHOCO), 3.92 (t,  $J = 6.2$  Hz, 4H, 2  $\times$  OCH<sub>2</sub>), 3.63 (t,  $J = 6.8$  Hz, 4H, 2  $\times$  NCH<sub>2</sub>), 2.31-2.01 (m, 8H, 4  $\times$  allylic methylene), 1.99-1.05 (m, 112H, 50  $\times$  CH<sub>2</sub>, 12  $\times$  CH), 1.01 (s, 6H, 2  $\times$  CH<sub>3</sub>), 0.97 (d,  $J = 6.4$  Hz, 6H, 2  $\times$  CH<sub>3</sub>), 0.92 (s, 6H, 2  $\times$  CH<sub>3</sub>), 0.87 (d,  $J = 1.5$  Hz, 6H, 2  $\times$  CH<sub>3</sub>), 0.85 (d,  $J = 1.3$  Hz, 6H, 2  $\times$  CH<sub>3</sub>), 0.67 (s, 6H, 2  $\times$  CH<sub>3</sub>);  $^{13}\text{C}$  NMR (100MHz,  $\text{CDCl}_3$ ): 173.19, 166.23, 164.47, 160.22, 139.71, 134.91, 122.58, 114.51, 105.51, 102.17, 73.72, 67.68, 58.07, 56.69, 56.15, 50.04, 42.32, 39.74, 39.52, 38.16, 37, 36.6, 36.18, 35.78, 34.65, 32.43, 31.9, 29.67, 29.36, 29.02, 28.2, 28.01, 27.82, 27.12, 25.89, 24.96, 24.28, 23.83, 22.79, 22.68, 22.55, 21.03, 19.31, 18.71, 14.12, 11.84; MS (FAB+):  $m/z$  for  $\text{C}_{108}\text{H}_{176}\text{N}_2\text{O}_8\text{Pd}$ : 1735.7, Found: 1735.5.

### Pd-7,16

A pale greenish solid; yield: 70 %; IR (KBr Pellet):  $\nu_{\max}$  in  $\text{cm}^{-1}$  2922, 1735, 1607, 1531, 1221, 1176;  $^1\text{H}$  NMR (400MHz,  $\text{CDCl}_3$ ): 7.46 (s, 2H, N=CH), 7.05 (d,  $J = 8.8$  Hz, 2H, Ar), 6.28 (d,  $J = 1.8$  Hz, 2H, Ar), 6.20 (dd,  $J_1 = 8.4$  Hz,  $J_2 = 2.0$  Hz, 2H, Ar), 5.37 (brd,  $J = 4.2$  Hz, 2H, 2  $\times$  olefinic), 4.62 (m, 2H, 2  $\times$  CHOCO), 3.92 (t,  $J = 6.5$  Hz, 4H, 2  $\times$  OCH<sub>2</sub>), 3.63 (t,  $J = 6.7$  Hz, 4H, 2  $\times$  NCH<sub>2</sub>), 2.31-2.01 (m, 8H, 4  $\times$  allylic methylene), 1.99-1.05 (m, 128H, 58  $\times$  CH<sub>2</sub>, 12  $\times$  CH), 1.01 (s, 6H, 2  $\times$  CH<sub>3</sub>), 0.97 (d,  $J = 6.9$  Hz, 6H, 2  $\times$  CH<sub>3</sub>), 0.92 (s, 6H, 2  $\times$  CH<sub>3</sub>), 0.87 (d,  $J = 1.5$  Hz, 6H, 2  $\times$  CH<sub>3</sub>), 0.85 (d,  $J$

= 1.4 Hz, 6H, 2 × CH<sub>3</sub>), 0.67 (s, 6H, 2 × CH<sub>3</sub>); MS (FAB+): m/z for C<sub>116</sub>H<sub>193</sub>N<sub>2</sub>O<sub>8</sub>Pd (M+1): 1847.9, Found: 1847.5.

#### IV.2. General procedure for the synthesis of bis [4-((4-cholesteryl alkonate)oxy)-N-(n-alkyl)salicyaldiminato]copper (II) complexes (Cu-n,R series).

A solution of dimer-like (**L-n,R**) compound (0.30 mmol, 1 equiv.) in equal quantity of dry methanol (10 ml) and benzene (10 ml) was refluxed for 30 min. To the hot yellow color solution, copper (II) acetate monohydrate (0.16 mmol, 0.55 equiv.) in dry methanol (5 ml) was added and refluxed for 1 h. A thick greenish solution obtained was cooled to get a precipitate that was collected by filtration, it was purified by repeated recrystallization from a mixture of CH<sub>2</sub>Cl<sub>2</sub>-EtOH (1:9).

##### Cu-3,6

A greenish-yellow solid; yield: 79 %; IR (KBr Pellet):  $\nu_{\max}$  in cm<sup>-1</sup> 2933, 1736, 1623, 1530, 1240, 1172; MS (FAB+): m/z calcd for C<sub>88</sub>H<sub>137</sub>N<sub>2</sub>O<sub>8</sub>Cu (M+1): 1413.6, Found: 1413.3.

##### Cu-3,7

A greenish-yellow solid; yield: 71 %; IR (KBr Pellet):  $\nu_{\max}$  in cm<sup>-1</sup> 2932, 1736, 1607, 1530, 1241, 1172; MS (FAB+): m/z calcd for C<sub>90</sub>H<sub>141</sub>N<sub>2</sub>O<sub>8</sub>Cu (M+1): 1441.6, Found: 1441.1.

##### Cu-3,8

A greenish-yellow solid; yield: 72 %; IR (KBr Pellet):  $\nu_{\max}$  in cm<sup>-1</sup> 2931, 1728, 1611, 1529, 1239, 1171; MS (FAB+): m/z calcd for C<sub>92</sub>H<sub>145</sub>N<sub>2</sub>O<sub>8</sub>Cu (M+1): 1469.6, Found: 1469.4.

##### Cu-3,9

A greenish-yellow solid; yield: 79 %; IR (KBr Pellet):  $\nu_{\max}$  in cm<sup>-1</sup> 2927, 1727, 1608, 1528, 1238, 1172; MS (FAB+): m/z calcd for C<sub>94</sub>H<sub>148</sub>N<sub>2</sub>O<sub>8</sub>Cu: 1496.7, Found: 1496.9.

##### Cu-3,10

A greenish-yellow solid; yield: 77 %; IR (KBr Pellet):  $\nu_{\max}$  in cm<sup>-1</sup> 2927, 1728, 1608, 1527, 1238, 1171; MS (FAB+): m/z calcd for C<sub>96</sub>H<sub>152</sub>N<sub>2</sub>O<sub>8</sub>Cu: 1524.7, Found: 1524.3; Anal. calcd for C<sub>96</sub>H<sub>152</sub>N<sub>2</sub>O<sub>8</sub>Cu: C, 75.57; H, 10.04; N, 1.84. Found: C, 75.40; H, 9.95; N, 1.69.

##### Cu-3,11

A greenish-yellow solid; yield: 75 %; IR (KBr Pellet):  $\nu_{\max}$  in cm<sup>-1</sup> 2926, 1732, 1615, 1532, 1234, 1172; MS (FAB+): m/z calcd for C<sub>98</sub>H<sub>156</sub>N<sub>2</sub>O<sub>8</sub>Cu (M+1): 1553.8, Found: 1553.9.

### **Cu-3,12**

A greenish-yellow solid; yield: 80 %; IR (KBr Pellet):  $\nu_{\max}$  in  $\text{cm}^{-1}$  2926, 1728, 1608, 1527, 1238, 1171; MS (FAB+):  $m/z$  calcd for  $\text{C}_{100}\text{H}_{161}\text{N}_2\text{O}_8\text{Cu}$  (M+1): 1581.8, Found: 1581.3.

### **Cu-3,16**

A greenish-yellow solid; yield: 78 %; IR (KBr Pellet):  $\nu_{\max}$  in  $\text{cm}^{-1}$  2922, 1731, 1614, 1534, 1238, 1172; MS (FAB+):  $m/z$  calcd for  $\text{C}_{108}\text{H}_{176}\text{N}_2\text{O}_8\text{Cu}$ : 1692.9, Found: 1693.3.

### **Cu-4,9**

A greenish-yellow solid; yield: 79 %; IR (KBr Pellet):  $\nu_{\max}$  in  $\text{cm}^{-1}$  2929, 1733, 1609, 1533, 1223, 1169; MS (FAB+):  $m/z$  calcd for  $\text{C}_{96}\text{H}_{152}\text{N}_2\text{O}_8\text{Cu}$ : 1524.7, Found: 1524.9.

### **Cu-4,16**

A greenish-yellow solid; yield: 68 %; IR (KBr Pellet):  $\nu_{\max}$  in  $\text{cm}^{-1}$  2923, 1736, 1603, 1534, 1222, 1196; MS (FAB+):  $m/z$  calcd for  $\text{C}_{110}\text{H}_{181}\text{N}_2\text{O}_8\text{Cu}$  (M+1): 1721.9, Found: 1721.7; Anal. calcd for  $\text{C}_{110}\text{H}_{180}\text{N}_2\text{O}_8\text{Cu}$ : C, 76.72; H, 10.53; N, 1.63. Found: C, 76.47; H, 10.31; N, 1.56.

### **Cu-5,6**

A greenish-yellow solid; yield: 83 %; IR (KBr Pellet):  $\nu_{\max}$  in  $\text{cm}^{-1}$  2933, 1732, 1606, 1530, 1239, 1174; MS (FAB+):  $m/z$  calcd for  $\text{C}_{92}\text{H}_{144}\text{N}_2\text{O}_8\text{Cu}$ : 1469.6, Found: 1469.4.

### **Cu-5,7**

A greenish-yellow solid; yield: 80 %; IR (KBr Pellet):  $\nu_{\max}$  in  $\text{cm}^{-1}$  2934, 1735, 1606, 1532, 1235, 1174; MS (FAB+):  $m/z$  calcd for  $\text{C}_{94}\text{H}_{148}\text{N}_2\text{O}_8\text{Cu}$ : 1496.7, Found: 1496.6.

### **Cu-5,8**

A greenish-yellow solid; yield: 71 %; IR (KBr Pellet):  $\nu_{\max}$  in  $\text{cm}^{-1}$  2934, 1735, 1608, 1531, 1235, 1175; MS (FAB+):  $m/z$  calcd for  $\text{C}_{96}\text{H}_{152}\text{N}_2\text{O}_8\text{Cu}$ : 1524.7, Found: 1524.8.

### **Cu-5,9**

A greenish-yellow solid; yield: 74 %; IR (KBr Pellet):  $\nu_{\max}$  in  $\text{cm}^{-1}$  2933, 1735, 1619, 1530, 1237, 1175; MS (FAB+):  $m/z$  calcd for  $\text{C}_{98}\text{H}_{157}\text{N}_2\text{O}_8\text{Cu}$  (M+1): 1553.7, Found: 1553.1.

### **Cu-5,10**

A greenish-yellow solid; yield: 73 %; IR (KBr Pellet):  $\nu_{\max}$  in  $\text{cm}^{-1}$  2926, 1735, 1619, 1531, 1237, 1176; MS (FAB+):  $m/z$  calcd for  $\text{C}_{100}\text{H}_{160}\text{N}_2\text{O}_8\text{Cu}$ : 1580.8, Found: 1580.7; Anal. calcd for  $\text{C}_{104}\text{H}_{168}\text{N}_2\text{O}_8\text{Cu}$ : C, 76.26; H, 10.34; N, 1.71. Found: C, 76.09; H, 10.28; N, 1.65.

### **Cu-5,11**

A greenish-yellow solid; yield: 68 %; IR (KBr Pellet):  $\nu_{\max}$  in  $\text{cm}^{-1}$  2926, 1735, 1608, 1531, 1223, 1172; MS (FAB+):  $m/z$  calcd for  $\text{C}_{102}\text{H}_{164}\text{N}_2\text{O}_8\text{Cu}$ : 1608.8, Found: 1608.7.

### **Cu-5,12**

A greenish-yellow solid; yield: 68 %; IR (KBr Pellet):  $\nu_{\max}$  in  $\text{cm}^{-1}$  2925, 1734, 1607, 1533, 1222, 1121; MS (FAB+): m/z calcd for  $\text{C}_{104}\text{H}_{169}\text{N}_2\text{O}_8\text{Cu}$  (M+1): 1637.8, Found: 1637.9.

### **Cu-5,16**

A greenish-yellow solid; yield: 73 %; IR (KBr Pellet):  $\nu_{\max}$  in  $\text{cm}^{-1}$  2924, 1734, 1606, 1531, 1224, 1175; MS (FAB+): m/z calcd for  $\text{C}_{112}\text{H}_{185}\text{N}_2\text{O}_8\text{Cu}$  (M+1): 1749, Found: 1750.6.

### **Cu-7,6**

A greenish-yellow solid; yield: 68 %; IR (KBr Pellet):  $\nu_{\max}$  in  $\text{cm}^{-1}$  2933, 1731, 1620, 1531, 1240, 1175; MS (FAB+): m/z calcd for  $\text{C}_{96}\text{H}_{152}\text{N}_2\text{O}_8\text{Cu}$ : 1524.7, Found: 1524.7.

### **Cu-7,7**

A greenish-yellow solid; yield: 70 %; IR (KBr Pellet):  $\nu_{\max}$  in  $\text{cm}^{-1}$  2932, 1732, 1606, 1532, 1222, 1174; MS (FAB+): m/z calcd for  $\text{C}_{98}\text{H}_{156}\text{N}_2\text{O}_8\text{Cu}$ : 1552.7, Found: 1552.5.

### **Cu-7,8**

A greenish-yellow solid; yield: 73 %; IR (KBr Pellet):  $\nu_{\max}$  in  $\text{cm}^{-1}$  2932, 1736, 1624, 1530, 1220, 1176; MS (FAB+): m/z calcd for  $\text{C}_{100}\text{H}_{160}\text{N}_2\text{O}_8\text{Cu}$ : 1580.8, Found: 1580.6; Anal. calcd for  $\text{C}_{100}\text{H}_{160}\text{N}_2\text{O}_8\text{Cu}$ : C, 75.93; H, 10.19; N, 1.77. Found: C, 75.76; H, 10.07; N, 1.59.

### **Cu-7,9**

A greenish-yellow solid; yield: 75 %; IR (KBr Pellet):  $\nu_{\max}$  in  $\text{cm}^{-1}$  2934, 1734, 1620, 1530, 1219, 1176; MS (FAB+): m/z calcd for  $\text{C}_{102}\text{H}_{164}\text{N}_2\text{O}_8\text{Cu}$ : 1584.8, Found: 1584.7.

### **Cu-7,10**

A greenish-yellow solid; yield: 77 %; IR (KBr Pellet):  $\nu_{\max}$  in  $\text{cm}^{-1}$  2934, 1736, 1623, 1530, 1241, 1176; MS (FAB+): m/z calcd for  $\text{C}_{104}\text{H}_{168}\text{N}_2\text{O}_8\text{Cu}$ : 1636.8, Found: 1636.2.

### **Cu-7,11**

A greenish-yellow solid; yield: 73 %; IR (KBr Pellet):  $\nu_{\max}$  in  $\text{cm}^{-1}$  2932, 1736, 1623, 1530, 1220, 1176; MS (FAB+): m/z calcd for  $\text{C}_{106}\text{H}_{172}\text{N}_2\text{O}_8\text{Cu}$ : 1644.9, Found: 1644.7.

### **Cu-7,12**

A greenish-yellow solid; yield: 79 %; IR (KBr Pellet):  $\nu_{\max}$  in  $\text{cm}^{-1}$  2923, 1735, 1619, 1532, 1220, 1177; MS (FAB+): m/z calcd for  $\text{C}_{108}\text{H}_{176}\text{N}_2\text{O}_8\text{Cu}$ : 1692.9, Found: 1692.0.

### **Cu-7,16**

A greenish-yellow solid; yield: 83 %; IR (KBr Pellet):  $\nu_{\max}$  in  $\text{cm}^{-1}$  2921, 1736, 1609, 1537, 1222, 1177; MS (FAB+): m/z calcd for  $\text{C}_{116}\text{H}_{192}\text{N}_2\text{O}_8\text{Cu}$ : 1805.5, Found: 1806.0.
